# Supplementary material for: Recommendations for Delivering Oral Health Advice: a Qualitative Supplementary Analysis of Dental Teams, Parents’ and Children’s Experiences&nbsp;
Source: Research Square preprint supplement (doi:10.21203/rs.3.rs-100036/v1), 2020-11-02
Supplement: Supplementary file 1 [file 501f6dde57220fd836942be7.docx]

**COREQ (COnsolidated criteria for REporting Qualitative research) Checklist**

A checklist of items that should be included in reports of qualitative research. You must report the page number in your manuscript where you consider each of the items listed in this checklist. If you have not included this information, either revise your manuscript accordingly before submitting or note N/A.

| **Topic** | **Item No.** | **Guide Questions/Description** | **Reported on Page No.** |
| --- | --- | --- | --- |
| **Domain 1: Research team and reflexivity** |  |  |  |
| *Personal characteristics* |  |  |  |
| Interviewer/facilitator | 1 | Which author/s conducted the interview or focus group? | Information pertaining to the original studies can be found in the “Additional file: Table 3” under Method:  “RD, JO & KV-C All researchers all had experience in conducting qualitative research from different disaplines (Psychology and Dentistry). KV-C and RD were a qualitative researchers at the time of the studies. “  Personal characteristics of the researcher in the supplementary analysis can be found on page 4 Line 124 |
| Credentials | 2 | What were the researcher’s credentials? E.g. PhD, MD | Information pertaining to the original studies can be found in the “Additional file: Table 3” under Method  Personal characteristics of the researcher in the supplementary analysis can be found on page 4 Line 125 |
| Occupation | 3 | What was their occupation at the time of the study? | Information pertaining to the original studies can be found in the “Additional file: Table 3” under Method  “KV-C and RD were a qualitative researchers at the time of the studies.”  Personal characteristics of the researcher in the supplementary analysis can be found on page 4 Line 125 |
| Gender | 4 | Was the researcher male or female? | Information pertaining to the original studies can be found in the additional file under Method section  Personal characteristics of the researcher in the supplementary analysis can be found on page 4 Line 125 |
| Experience and training | 5 | What experience or training did the researcher have? | Information pertaining to the original studies can be found in the “Additional file: Table 3” under Method section  “KV-C and RD were a qualitative researchers at the time of the studies.”  Personal characteristics of the researcher in the supplementary analysis can be found on page 4 Line 126 |
| *Relationship with participants* |  |  |  |
| Relationship established | 6 | Was a relationship established prior to study commencement? | Personal characteristics of the researcher in the supplementary analysis can be found on page 4 Line 124 |
| Participant knowledge of the interviewer | 7 | What did the participants know about the researcher? e.g. personal goals, reasons for doing the research | Personal characteristics of the researcher in the supplementary analysis can be found on page 4 Line 124-128 |
| Interviewer characteristics | 8 | What characteristics were reported about the inter viewer/facilitator? e.g. Bias, assumptions, reasons and interests in the research topic | Personal characteristics of the researcher in the supplementary analysis can be found on page 4 Line 24 |
| **Domain 2: Study design** |  |  |  |
| *Theoretical framework* |  |  |  |
| Methodological orientation and Theory | 9 | What methodological orientation was stated to underpin the study? e.g.  grounded theory, discourse analysis, ethnography, phenomenology, content analysis | Page 3: Line 117 |
| *Participant selection* |  |  |  |
| Sampling | 10 | How were participants selected? e.g. purposive, convenience, consecutive, snowball | Further details of this is highlighted within the Additional file: Table 3, under “Sample”  Children’s focus groups-  Page 4: Line 149  Parents focus groups-  Page 4: Line 139  Dental team member focus groups:  Page 4: Line 133 |
| Method of approach | 11 | How were participants approached? e.g. face-to-face, telephone, mail, email | Further details of this is highlighted within the Additional file: Table 3, under “Sample” |
| Sample size | 12 | How many participants were in the study? | Children’s focus groups-  Page 4: Line 148-150  Parents focus groups-  Page 4: Line 143  Dental team member focus groups:  Page 4: Line 134 |
| Non-participation | 13 | How many people refused to participate or dropped out? Reasons? | Further details of this is highlighted within the Additional file: Table 3, under “Sample”  “A table with various non dental academic related activities was provided, for children who were not consented to take part in the study.” |
| *Setting* |  |  |  |
| Setting of data collection | 14 | Where was the data collected? e.g. home, clinic, workplace | Children’s focus groups-  Page 4: Line 150  Parents focus groups-  Page 4: Line 146  Dental team member focus groups:  Page 4: Line 136-137 |
| Presence of nonparticipants | 15 | Was anyone else present besides the participants and researchers? | Further details of this is highlighted within the Additional file: Table 3, under “Method”  “Teachers of the children were present within these focus groups.” |
| Description of sample | 16 | What are the important characteristics of the sample? e.g. demographic data, date | Page 4: Line 152-153  Page 4: Line 133 |
| *Data collection* |  |  |  |
| Interview guide | 17 | Were questions, prompts, guides provided by the authors? Was it pilot tested? | Page 4 line 154 |
| Repeat interviews | 18 | Were repeat inter views carried out? If yes, how many? | n/a |
| Audio/visual recording | 19 | Did the research use audio or visual recording to collect the data? | Information pertaining to the original studies can be found in the “Additional file: Table 3” under “Method”  “groups were audio-recorded and professionally transcribed in verbatim.” |
| Field notes | 20 | Were field notes made during and/or after the inter view or focus group? | Page 4: Line 126 |
| Duration | 21 | What was the duration of the inter views or focus group? | Information pertaining to the original studies can be found in the “Additional file: Table 3” under “Method”  “ Time taken for focus groups: 40-60 minutes.” |
| Data saturation | 22 | Was data saturation discussed? | Information pertaining to the original studies can be found in the “Additional file: Table 3” under “Method” |
| Transcripts returned | 23 | Were transcripts returned to participants for comment and/or correction? | Page 5: Line 176 |
| **Topic** | **Item No.** | **Guide Questions/Description** | **Reported on Page No.** |
|  |  |  |  |
| **Domain 3: analysis and findings** |  |  |  |
| *Data analysis* |  |  |  |
| Number of data coders | 24 | How many data coders coded the data? | Page 5: Line 171 |
| Description of the coding tree | 25 | Did authors provide a description of the coding tree? | Please see page 15 Table 2 |
| Derivation of themes | 26 | Were themes identified in advance or derived from the data? | Page 5: Line 171 |
| Software | 27 | What software, if applicable, was used to manage the data? | n/a |
| Participant checking | 28 | Did participants provide feedback on the findings? | Page 5: Line 176 |
| *Reporting* |  |  |  |
| Quotations presented | 29 | Were participant quotations presented to illustrate the themes/findings?  Was each quotation identified? e.g. participant number | Yes, please see page 6: Line 205 for example |
| Data and findings consistent | 30 | Was there consistency between the data presented and the findings? | Yes, please see page 15 Table 2 |
| Clarity of major themes | 31 | Were major themes clearly presented in the findings? | Yes, please see page 15 Table 2 |
| Clarity of minor themes | 32 | Is there a description of diverse cases or discussion of minor themes? | N/A ( This supplementary analysis study focused on the commonalties) |

Developed from: Tong A, Sainsbury P, Craig J. Consolidated criteria for reporting qualitative research (COREQ): a 32-item checklist for interviews and focus groups. *International Journal for Quality in Health Care*. 2007. Volume 19, Number 6: pp. 349 – 357

**Once you have completed this checklist, please save a copy and upload it as part of your submission. DO NOT** **include this checklist as part of the main manuscript document. It must be uploaded as a separate file.**
